# Supplementary material for: French DNA (Book Reviews).
Source: MDPI journal article supplement (doi:10.3390/ani11082301), 2001-01-01
Supplement: s1 [file s1]

## Supplementary Material

**Table S1:** Model selection for the effect of IPT and the HG in the number of different macrophage subtypes detected in canine lymph node lymphomas.

| Marker        | Biological model | K | AIC <sub>c</sub> | ΔAIC <sub>c</sub> | W <sub>i</sub> | R <sup>2</sup> (adj) |
|---------------|------------------|---|------------------|-------------------|----------------|----------------------|
| <b>Iba1</b>   | HG+IPT+HG*IPT    | 4 | 1153.4           | 0.00              | 1.00           | 0.657                |
|               | HG+IPT           | 3 | 1307.2           | 153.83            | 0.00           | 0.593                |
|               | IPT              | 2 | 1307.5           | 154.14            | 0.00           | 0.272                |
|               | Null model       | 1 | 1331.9           | 178.53            | 0.00           | <0.001               |
|               | HG               | 2 | 1333.6           | 180.21            | 0.00           | 0.162                |
| <b>MAC387</b> | HG+IPT+HG*IPT    | 4 | 1846.6           | 0.00              | 1.00           | 0.997                |
|               | HG+IPT           | 3 | 1969.3           | 122.69            | 0.00           | 0.994                |
|               | HG               | 2 | 2071.2           | 224.61            | 0.00           | 0.980                |
|               | IPT              | 2 | 2141.0           | 294.41            | 0.00           | 0.873                |
|               | Null model       | 1 | 2298.8           | 452.14            | 0.00           | <0.001               |
| <b>CD204</b>  | HG+IPT+HG*IPT    | 4 | 1588.0           | 0.00              | 1.00           | 0.996                |
|               | HG               | 2 | 1646.5           | 58.48             | 0.00           | 0.943                |
|               | HG+IPT           | 3 | 1647.6           | 59.64             | 0.00           | 0.946                |
|               | IPT              | 2 | 1711.3           | 123.30            | 0.00           | 0.237                |
|               | Null model       | 1 | 1715.7           | 127.69            | 0.00           | 0.000                |
| <b>CD163</b>  | HG+IPT+HG*IPT    | 4 | 1430.6           | 0.00              | 1.00           | 0.994                |
|               | HG+IPT           | 3 | 1478.2           | 47.61             | 0.00           | 0.957                |
|               | HG               | 2 | 1491.7           | 61.09             | 0.00           | 0.918                |
|               | IPT              | 2 | 1547.4           | 116.74            | 0.00           | 0.240                |
|               | Null model       | 1 | 1551.9           | 121.25            | 0.00           | <0.001               |
| <b>iNOS</b>   | HG+IPT+HG*IPT    | 4 | 668.1            | 0.00              | 1.00           | 0.973                |
|               | HG+IPT           | 3 | 728.6            | 60.47             | 0.00           | 0.668                |
|               | IPT              | 2 | 733.9            | 65.83             | 0.00           | 0.545                |
|               | HG               | 2 | 749.4            | 81.32             | 0.00           | 0.153                |
|               | Null model       | 1 | 751.2            | 83.12             | 0.00           | <0.001               |

IPT, immunophenotype. HG, histological grade. \*, interaction. +, additive effect. K, number of estimated parameters. AIC<sub>c</sub>, Akaike's Information Criterion corrected for small sample size. ΔAIC<sub>c</sub>, difference of AIC<sub>c</sub> between the model and the most-parsimonious model. W<sub>i</sub>, Akaike weight of the model. R<sup>2</sup> (adj), adjusted R<sup>2</sup> of the fitted model (see Burnham and Anderson, 2002 and Zuur, 2007).
